# Supplementary material for: Anti-platelet factor 4/polyanion antibodies mediate a new mechanism of autoimmunity
Source: PubMed Central journal article supplement (PMC5458132; doi:10.1038/ncomms14945), 2017-05-22
Supplement: ncomms14945-s1.pdf [file ncomms14945-s1.pdf]

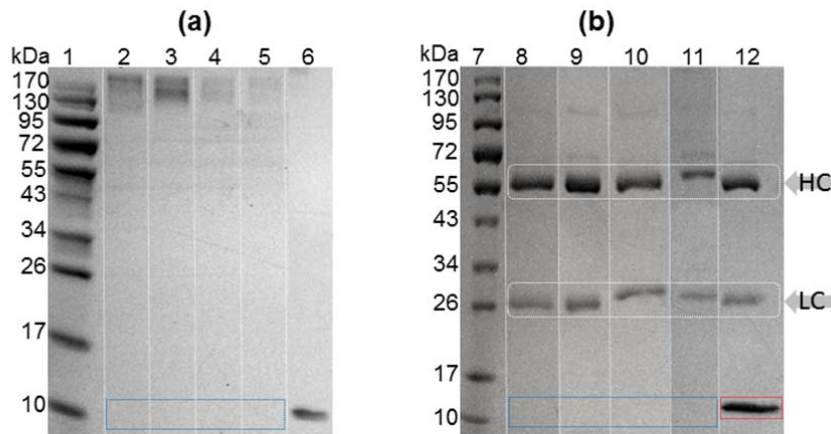

1  
2 **Supplementary Figure 1. SDS-PAGE of purified PF4/H ABS concentrated to 100  $\mu\text{g/ml}$**   
3 **(a)** non-reducing conditions: lane 1: marker; lane 2: control IgG; lane 3: group-1 ABS; lane 4: group-  
4 2 ABS; lane 5: group-3 ABS; lane 6: purified PF4; **(b)** reducing conditions: lane 7: marker; lane 8:  
5 control IgG; lane 9: group-1 ABS; lane 10: group-2 ABS; lane 11: group-3 ABS; and lane 12: purified  
6 anti-PF4/H ABS contaminated with PF4 releasing from column. Markers (lane 1 and 7) with  
7 molecular weight up to 170 kDa were used. Molecular weights of ABS under non-reducing condition  
8 are  $\sim 170$  kDa; IgG was split into heavy chains (HC; upper white rectangular) and light chains (LC;  
9 lower white rectangular) under reducing condition. Only samples which were free of PF4 (blue  
10 rectangles) were used. If PF4 was found in the purified ABS fraction (red rectangular; lane 12); the  
11 ABS fraction was re-purified using a protein G column (the figure shows representative examples of  
12  $n=5$  antibody fractions analyzed for each antibody group).

13

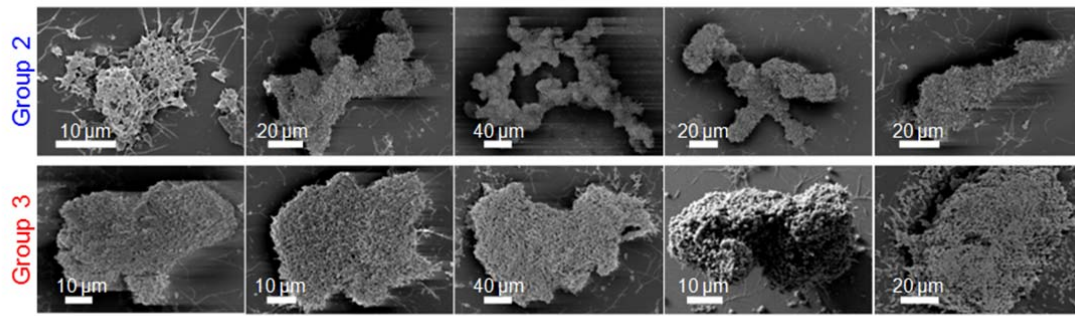

14  
15 **Supplementary Figure 2. SEM images of platelet aggregates in the HIPA test in the**  
16 **presence of reviparin after 15 min mixing**  
17 Platelets formed with group-2 ABS relaxed and extended clusters with many branches and tails (upper  
18 row), but tightly packed clusters in the presence of the group-3 ABS (bottom row). Scale bars are  
19 given in each image.

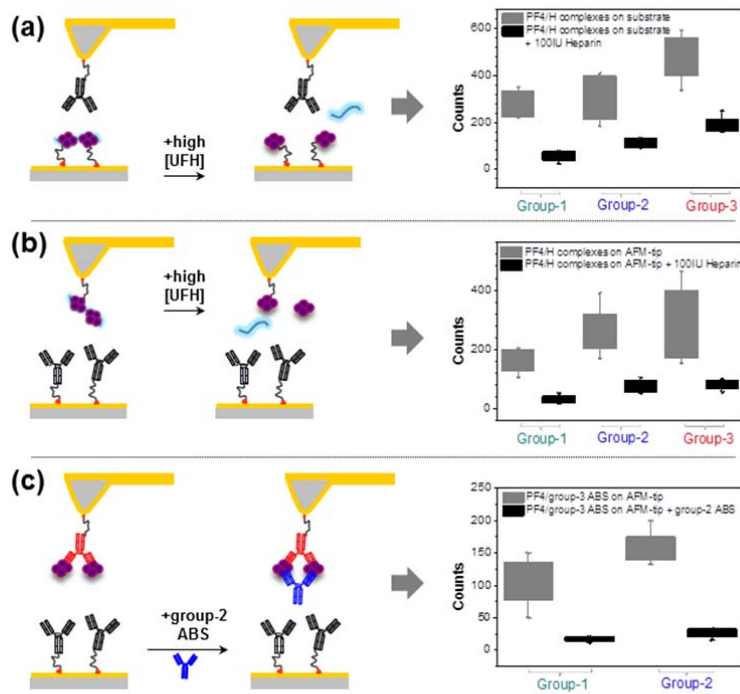

20

21 **Supplementary Figure 3. Blocking experiments**

22 (a) PF4/H complexes coated on the substrate are disrupted in the presence of high heparin  
 23 concentrations (100 IU/mL) resulting in massive reduction of interaction events (counts). (b) The  
 24 interaction reduced for all antibodies when they were incubated with PF4/H complexes on the tips in  
 25 the presence of high heparin concentrations (100 IU/mL). (c) Blocking of binding sites on PF4/group-  
 26 3 ABS complexes on the tip by group-2 ABS results in the minimal binding events with immobilized  
 27 group-1 and group-2 ABS.

28

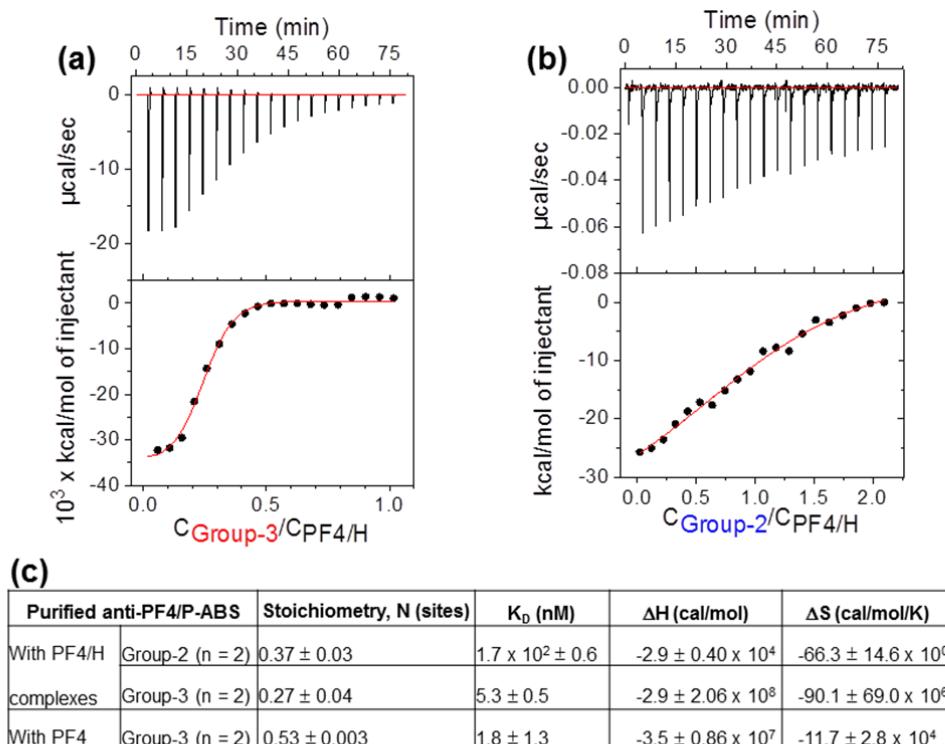

29

30 **Supplementary Figure 4. Thermodynamics of the interaction of group-2 and group-3**  
 31 **ABS with PF4/H complexes or PF4 obtained by Isothermal Titration Calorimetry (ITC)**

32 Representative binding isotherms for the titration of (a) group-2 or (b) group-3 ABS into the sample  
 33 cells containing PF4/H complexes: raw titration data (upper panels), and integrated heats (lower  
 34 panels). At concentrations of 62.5 nM, the thermograms clearly changed for both antibody groups (n  
 35 = 2). (c) Thermodynamic parameters of the interactions. The interaction between group-3 ABS  
 36 and PF4 ( $\Delta H = -3.5 \pm 0.86 \times 10^7$  cal/mol) or PF4/H complexes ( $\Delta H = -2.9 \pm 2.06 \times$   
 37  $10^8$  cal/mol) released much higher heat than that of the group-2 ABS ( $\Delta H = -2.9 \pm 0.4 \times 10^4$   
 38 cal/mol). The lower dissociation constant ( $K_D$ ) ~30-fold indicates that group-3 ABS formed  
 39 with PF4 ( $K_D = 1.8 \pm 1.3$ ) or PF4/H complexes ( $K_D = 5.3 \pm 0.5$ ) much more stable complexes  
 40 than group-2 ABS ( $K_D = 170 \pm 0.6$ ). Stoichiometry (n: binding sites) also indicates that  
 41 group-3 ABS cluster two PF4 tetramers (N = 0.53). Standard deviation ‘±’ was obtained from  
 42 antibodies purified from two sera per group.

43

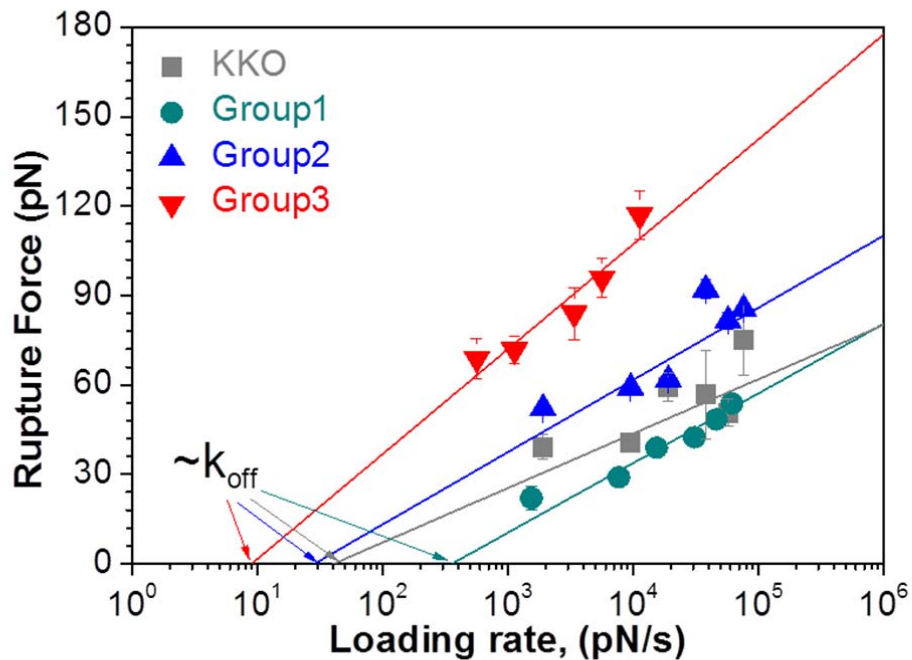

44

45 **Supplementary Figure 5. Binding kinetics of antibodies to PF4/H complexes**

46 Rupture forces recorded at different loading rates for KKO (grey), group-1 (dark cyan, n = 3), group-2  
 47 (blue, n = 3) and group-3 ABS (red, n = 3). Group-1 ABS show highest  $k_{off}$  value ( $15.6 \text{ s}^{-1}$ ), while  
 48 KKO ( $2.2 \text{ s}^{-1}$ ) has a similar thermal off-rate as group-2 ABS ( $2.0 \text{ s}^{-1}$ ), and group-3 ABS exhibit the  
 49 lowest  $k_{off}$  value ( $0.12 \text{ s}^{-1}$ ). The results indicate that group-3 ABS have the highest binding affinity to  
 50 PF4/H complexes, followed by KKO and group-2 ABS, while group-1 ABS have the lowest binding  
 51 affinity. KKO and group-1 samples contain homogeneous antibodies, while group-2 and group-3  
 52 contain antibodies with different characteristics. We therefore, pre-tested the cantilevers coated with  
 53 either group-2 or group-3 ABS and selected cantilevers which had an antibody bound, showing an  
 54 interaction force  $\sim 70 \text{ pN}$  for group-2 or  $\sim 90 \text{ pN}$  for group-3 ABS for measurements. Since these  
 55 antibodies were preselected, we did not observe the large variation of rupture force distributions  
 56 compared to the analysis of the unselected PF4/H ABS fraction shown in Fig. 3 and Fig. 4 (main text).  
 57 Data were obtained from the mean values of different antibodies obtained from different sera (n=3).

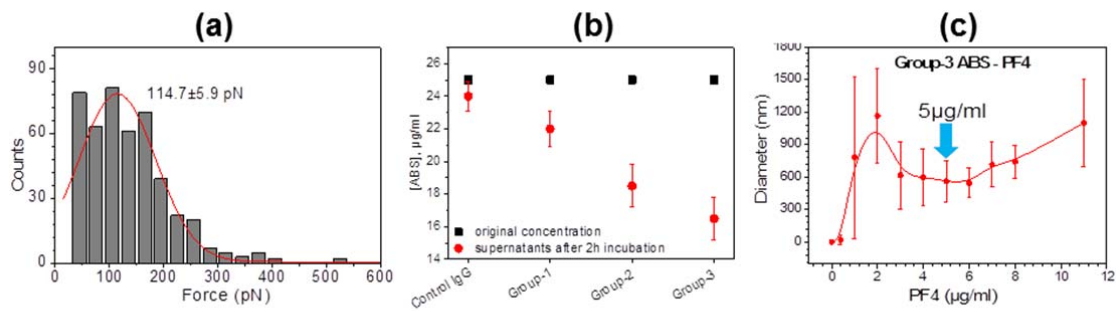

58

59 **Supplementary Figure 6. Additional evidence that group-3 ABS cluster PF4**

60 (a) ABS purified by a PF4 column and coated to the cantilevers interact with PF4/H complexes  
 61 showing a mean binding force ( $\pm$  the associated mean error) of  $114 \pm 5.9$  pN (n=3). (b) PF4/group-3  
 62 ABS complexes immobilized on the substrate created a target recognized by group 1-3 ABS.  
 63 Different ABS (n=2 for each group of ABS; 25 μg/mL) were incubated with PF4/group-3 ABS  
 64 complexes coated on the substrates. After 2h incubation, the ABS concentration of the supernatants  
 65 (red) reduced slightly for group-1 ABS, stronger for group-2 and strongest for group-3 ABS but no  
 66 significant change was observed for control IgG. (c) At PF4 concentrations  $\leq 3$  μg/ml, group-3 ABS  
 67 (10 μg/ml) form unstable complexes with PF4 as indicated by a large variation in size, stable  
 68 complexes were formed at PF4 concentrations from 3 to 6 μg/ml, and larger complexes were formed  
 69 at PF4 concentrations  $\geq 7$  μg/ml. A PF4 concentration of 5 μg/ml was selected for incubation with  
 70 group-3 ABS (10 μg/ml) to subsequently test the interaction of these complexes with group-1 and  
 71 group-2 ABS shown in Fig 5g of the main text.

72

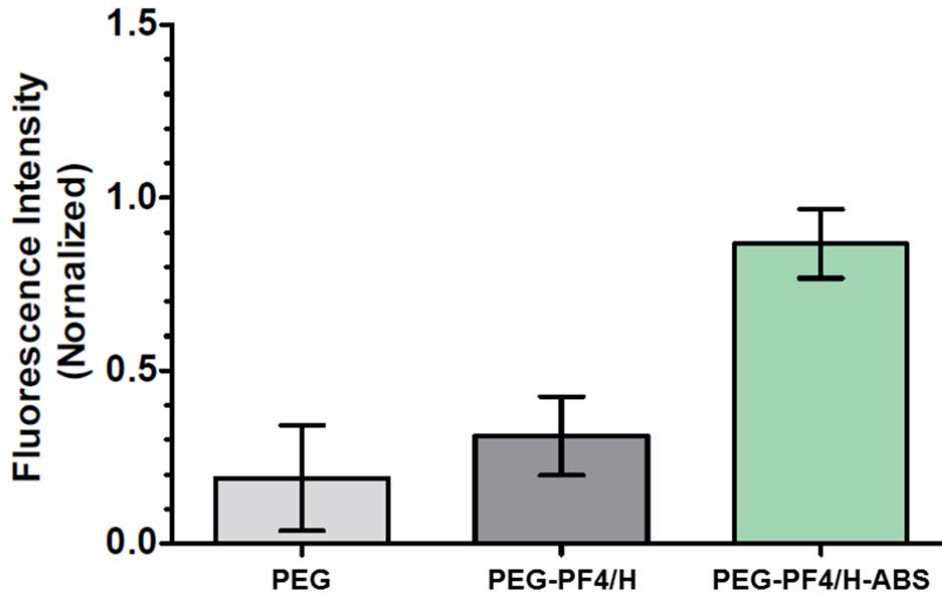

73

74 **Supplementary Figure 7. Quality control of surface coating for SMFS experiments**

75 Binding of PF4/H ABS to the coated PF4/H complexes was tested by fluorescent labeled anti-human  
76 IgG antibodies. Surface coated with PEG alone (light gray) shows lowest fluorescence intensity,  
77 higher fluorescence was obtained when PF4/H complexes bound to PEG (dark gray column;  
78 background signal of the experiment), and the highest signal was obtained when PF4/H ABS bound to  
79 PF4/H complexes immobilized on PEG (green). These results indicate that the antigenic complexes  
80 were maintained after binding to the solid phase.

81

82

83 **Supplementary Table 1. Characteristics of sera and purified PF4/P ABS**

| Antibody group                   | Sera | PF4/P IgG-EIA<br>(OD <sub>450nm</sub> ) |                            | HIPA   |                           |                         |              |                           |                         |
|----------------------------------|------|-----------------------------------------|----------------------------|--------|---------------------------|-------------------------|--------------|---------------------------|-------------------------|
|                                  |      | Original serum<br>(1:200)               | Purified ABS (20<br>µg/mL) | Serum  |                           |                         | Purified ABS |                           |                         |
|                                  |      |                                         |                            | Buffer | Reviparin<br>0.2<br>IU/mL | Heparin<br>100<br>IU/mL | Buffer       | Reviparin<br>0.2<br>IU/mL | Heparin<br>100<br>IU/mL |
| <b>Group-1<br/>(G1)</b><br>n = 5 | G1-1 | 2.06                                    | 0.76                       |        |                           |                         |              |                           |                         |
|                                  | G1-2 | 1.78                                    | 1.20                       |        |                           |                         |              |                           |                         |
|                                  | G1-3 | 1.72                                    | 0.59                       | -      | -                         | -                       | -            | -                         | -                       |
|                                  | G1-4 | 1.86                                    | 1.17                       |        |                           |                         |              |                           |                         |
|                                  | G1-5 | 2.01                                    | 1.50                       |        |                           |                         |              |                           |                         |
| <b>Group-2<br/>(G2)</b><br>n = 5 | G2-1 | 2.40                                    | 1.37                       |        |                           |                         |              |                           |                         |
|                                  | G2-2 | 2.30                                    | 1.99                       |        |                           |                         |              |                           |                         |
|                                  | G2-3 | 1.29                                    | 1.81                       | -      | +                         | -                       | -            | +                         | -                       |
|                                  | G2-4 | 2.06                                    | 1.71                       |        |                           |                         |              |                           |                         |
|                                  | G2-5 | 2.6                                     | 2.26                       |        |                           |                         |              |                           |                         |
| <b>Group-3<br/>(G3)</b><br>n = 5 | G3-1 | 2.68                                    | 3.27                       |        |                           |                         |              |                           |                         |
|                                  | G3-2 | 2.40                                    | 1.52                       |        |                           |                         |              |                           |                         |
|                                  | G3-3 | 2.82                                    | 2.74                       | +      | +                         | -                       | +            | +                         | -                       |
|                                  | G3-4 | 2.29                                    | 3.17                       |        |                           |                         |              |                           |                         |
|                                  | G3-5 | 2.60                                    | 1.81                       |        |                           |                         |              |                           |                         |

84 PF4 = platelet factor 4; P = polyanion; ABS = antibodies; OD = optical density; IU = international units

85 EIA and HIPA characteristics of the three antibody groups (n=5 sera/group). The purified antibodies  
 86 showed the same characteristics as their original sera in the HIPA test. The lower optical density (OD)  
 87 values in the PF4/heparin (PF4/H) EIA for the purified group-1 ABS indicate that these antibodies  
 88 might be present in serum at concentrations above 20 µg/mL.

89
